# Supplementary material for: Chromosome 6p22 Locus Associated with Clinically Aggressive Neuroblastoma
Source: Atypon-hosted journal article supplement (doi:10.1056/nejmoa0708698), 2008-05-08

## Supplementary Appendix

This appendix has been provided by the authors to give readers additional information about their work.

Supplement to: Maris JM, Mosse YP, Bradfield JP, et al. Chromosome 6p22 locus associated with clinically aggressive neuroblastoma. *N Engl J Med* 2008;358:2585-93. DOI: [10.1056/NEJMoa0708698](https://doi.org/10.1056/NEJMoa0708698).

## SUPPLEMENTARY INFORMATION

### Supplemental Methods

#### *Genome-wide SNP Genotyping*

DNA samples were surveyed for quality both by optical density spectrophotometry and the pico-green assay. Samples judged to be of sufficient quality for genotyping were assayed on the Illumina Infinium™ II HumanHap550 BeadChip technology,<sup>18, 19</sup>(Illumina, San Diego) at the Center for Applied Genomics at the Children's Hospital of Philadelphia. A total of 750 nanograms of germline genomic DNA was used to genotype each sample, according to the manufacturer's guidelines. On day one, genomic DNA was amplified 1000-1500-fold; and on day two, the amplified DNA was fragmented to ~300-600 basepairs (bp), precipitated and resuspended followed by hybridization onto a BeadChip. Single base extension (SBE) utilized a single probe sequence of approximately 50 bp long designed to hybridize immediately adjacent to the single nucleotide polymorphism (SNP) query site. Following targeted hybridization to the bead array, the arrayed SNP locus-specific primers (attached to beads) were extended with a single hapten-labeled dideoxynucleotide in the single base extension reaction. The haptens were subsequently detected by a multi-layer immunohistochemical sandwich assay. The Illumina BeadArray Reader scanned each BeadChip at two wavelengths and created an image file. As BeadChip images were collected, intensity values were determined for all instances of each bead type, and data files were created that summarized intensity values for each bead type. These files consisted of intensity data that was loaded directly into Illumina's genotype analysis software, BeadStudio. A bead pool manifest created from the Laboratory Information Management System (LIMS) database containing all the BeadChip data was loaded into BeadStudio along with the intensity data for the samples. BeadStudio used a normalization algorithm to minimize BeadChip to BeadChip variability. Once the normalization was complete,

the clustering algorithm was run to evaluate cluster positions for each locus and assign individual genotypes. Each locus was given an overall score based on the quality of the clustering and each individual genotype call was given a GenCall score. GenCall scores provided a quality metric that ranges from 0 to 1 assigned to every genotype called. GenCall scores were then calculated using information from the clustering of the samples. The location of each genotype relative to its assigned cluster determined its GenCall score.

### ***PCR-based genotyping for replication***

All cases and controls from the UK and CCG/Los Angeles were genotyped at all SNPs showing a single marker association statistic in the discovery set below the genome-wide significance threshold by PCR-based allelic discrimination assays. Assays were performed at the respective sites according to the manufacturer's instructions using an ABI PRISM 7900HT system. Primers and probes were designed using Primer Express (Applied Biosystems) or Primer Picker (KBioscience) software (sequences available upon request). Assays were performed in 384-well format and each plate contained negative control wells. Data analysis was performed using Sequence Detection System software version 2.1 software (Applied Biosystems) and by visual inspection.

**Table S1. Neuroblastoma patient and tumor characteristics of the 1032 cases used in the discovery set after exclusion of outliers in the Eigenstrat analysis of population stratification.**

| <b>Characteristic</b> | <b>Number (%)</b> |
|-----------------------|-------------------|
| <b>Sex</b>            |                   |
| Female                | 490 (48%)         |
| Male                  | 537 (52%)         |
| Unknown               | 5                 |
| <b>Age</b>            |                   |
| < 1 yr                | 386 (38%)         |
| ≥ 1 yr                | 638 (62%)         |
| Unknown               | 8                 |
| <b>INSS Stage</b>     |                   |
| Stage 1               | 217 (22%)         |
| Stage 2               | 145 (14%)         |
| Stage 3               | 156 (16%)         |
| Stage 4               | 411 (42%)         |
| Stage 4S              | 56 (6%)           |
| Unknown               | 47                |
| <b>MYCN</b>           |                   |
| Not Amplified         | 817 (83%)         |
| Amplified             | 167 (17%)         |
| Not available         | 48                |
| <b>Histology</b>      |                   |
| Favorable             | 463 (57%)         |
| Unfavorable           | 348 (48%)         |
| Not available         | 221               |
| <b>DNA index</b>      |                   |
| Hyperdiploid          | 522 (67%)         |
| Diploid               | 259 (33%)         |
| Not available         | 251               |

**Table S2. Neuroblastoma GWAS results in the discovery case series showing genotypes for all SNPs with genome-wide significant *P*-values. SNPs sorted by unadjusted *P*-value.**

| Chr | SNP       | Genome Position (Build 36) | Gene            | Ref Allele (A) | Minor Allele (B) | Cases |     |     |      | Controls |      |     |      | Allele test <i>P</i> -value |
|-----|-----------|----------------------------|-----------------|----------------|------------------|-------|-----|-----|------|----------|------|-----|------|-----------------------------|
|     |           |                            |                 |                |                  | AA    | AB  | BB  | N    | AA       | AB   | BB  | N    |                             |
| 6   | rs6939340 | 22247733                   | <i>FLJ22536</i> | A              | G                | 198   | 504 | 310 | 1012 | 567      | 1015 | 451 | 2033 | 7.01x10 <sup>-10</sup>      |
| 6   | rs4712653 | 22233943                   | <i>FLJ22536</i> | T              | C                | 208   | 503 | 285 | 996  | 604      | 1006 | 423 | 2033 | 1.16x10 <sup>-9</sup>       |
| 6   | rs9295536 | 22239908                   | <i>FLJ22536</i> | C              | A                | 239   | 536 | 256 | 1031 | 667      | 1003 | 370 | 2040 | 1.71x10 <sup>-9</sup>       |
| 20  | rs3790171 | 19170336                   | <i>SLC24A3</i>  | T              | C                | 671   | 327 | 32  | 1030 | 1519     | 492  | 32  | 2043 | 3.64x10 <sup>-8</sup>       |
| 20  | rs7272481 | 19206143                   | <i>SLC24A3</i>  | A              | G                | 708   | 295 | 27  | 1030 | 1577     | 446  | 20  | 2043 | 4.99x10 <sup>-8</sup>       |

Chr; chromosome. Genome position from NCBI build 36.

**Table S3. Replication effort of chromosome 20 association results.**

| SNP       | CHOP<br>Case<br>N | CHOP<br>Case<br>MAF | CHOP<br>Control<br>N | CHOP<br>Control<br>MAF | CHOP<br>P-<br>value | UK<br>Case<br>N | UK<br>Case<br>MAF | UK<br>Control<br>N | UK<br>Control<br>MAF | UK<br>P-<br>value | CCG<br>Case<br>N | CCG<br>Case<br>MAF | CCG<br>Control<br>N | CCG<br>Control<br>MAF | CCG<br>P-<br>value |
|-----------|-------------------|---------------------|----------------------|------------------------|---------------------|-----------------|-------------------|--------------------|----------------------|-------------------|------------------|--------------------|---------------------|-----------------------|--------------------|
| rs3790171 | 394               | 0.1396              | 1178                 | 0.1358                 | 0.7897              | 246             | 0.1524            | 787                | 0.1823               | 0.322             | ND               | ND                 | ND                  | ND                    | ND                 |
| rs7272481 | 394               | 0.1244              | 1178                 | 0.1231                 | 0.9249              | 243             | 0.146             | 763                | 0.163                | 0.370             | 59               | .1864              | 163                 | .3436                 | 0.09.              |

Three separate patient groups selected to be of Northern European decent were used for replication. Cases and controls from CHOP were selected as for the discovery set (see methods). Neuroblastoma patients from the United Kingdom (UK) were identified from Pediatric Oncology Centers across the country, and controls were from the 1958 Birth Cohort Collection. Likewise, neuroblastoma patients from the Children's Cancer Group (CCG) Trial CCG-3891 were selected from the Neuroblastoma Resource Bank at Children's Hospital Los Angeles. ND, not done.

**Table S4. Genotype frequency distributions in clinical subgroups and controls at three 6p22 SNPs.**

|               | rs4712653     |                |               |                                  |        | rs9295536     |                |               |                                  |        | rs6939340     |                |               |                                  |       |
|---------------|---------------|----------------|---------------|----------------------------------|--------|---------------|----------------|---------------|----------------------------------|--------|---------------|----------------|---------------|----------------------------------|-------|
|               | TT            | CT             | CC            | OR<br>(95%CI)                    | P      | CC            | AC             | AA            | OR<br>(95%CI)                    | P      | AA            | AG             | GG            | OR<br>(95%CI)                    | P     |
| Stage 4       | 71<br>(17.8)  | 196<br>(49.1)  | 132<br>(33.1) | 1.68*<br>(1.16-2.44)             | 0.006  | 85<br>(20.7)  | 205<br>(50)    | 120<br>(29.3) | 1.63*<br>(1.13-2.34)             | 0.008  | 68<br>(16.9)  | 198<br>(49.2)  | 136<br>(33.8) | 1.53*<br>(1.05-2.22)             | 0.02  |
| Not Stage 4   | 133<br>(23.4) | 288<br>(50.7)  | 147<br>(25.9) | 1.42 <sup>†</sup><br>(1.07-1.87) | 0.015  | 150<br>(25.4) | 311<br>(52.6)  | 130<br>(22.0) | 1.47 <sup>†</sup><br>(1.09-1.96) | 0.009  | 127<br>(21.8) | 288<br>(49.6)  | 166<br>(28.6) | 1.28 <sup>†</sup><br>(0.97-1.68) | 0.08  |
| MYCN Amp      | 26<br>(15.9)  | 70<br>(42.9)   | 67<br>(41.1)  | 2.17*<br>(1.32-3.57)             | 0.002  | 32<br>(19.2)  | 74<br>(44.3)   | 61<br>(36.5)  | 2.04*<br>(1.27-3.28)             | 0.003  | 25<br>(15.0)  | 74<br>(44.3)   | 68<br>(40.7)  | 1.99*<br>(1.21-3.95)             | 0.006 |
| MYCN Not Amp  | 173<br>(22.0) | 408<br>(51.9)  | 205<br>(26.1) | 1.98 <sup>†</sup><br>(1.39-2.81) | 0.0001 | 196<br>(24.1) | 437<br>(53.5)  | 183<br>(22.4) | 1.99 <sup>†</sup><br>(1.39-2.84) | 0.0001 | 166<br>(20.8) | 406<br>(50.9)  | 226<br>(28.3) | 1.74 <sup>†</sup><br>(1.23-2.45) | 0.002 |
| High-risk     | 65<br>(16.9)  | 191<br>(49.6)  | 129<br>(33.5) | 1.83*<br>(1.25-2.68)             | 0.002  | 77<br>(19.5)  | 198<br>(50.0)  | 121<br>(30.5) | 1.95*<br>(1.34-2.83)             | 0.0004 | 66<br>(16.9)  | 186<br>(47.7)  | 138<br>(35.4) | 1.63*<br>(1.11-2.38)             | 0.01  |
| Not High-risk | 130<br>(23.5) | 281<br>(50.9)  | 141<br>(25.5) | 1.47 <sup>†</sup><br>(1.10-1.95) | 0.008  | 149<br>(25.9) | 306<br>(53.2)  | 120<br>(20.9) | 1.67 <sup>†</sup><br>(1.24-2.24) | 0.0006 | 121<br>(21.5) | 287<br>(51.0)  | 155<br>(27.5) | 1.44 <sup>†</sup><br>(1.09-1.90) | 0.01  |
| Controls      | 604<br>(29.7) | 1006<br>(49.5) | 423<br>(20.8) |                                  |        | 667<br>(32.7) | 1003<br>(49.2) | 370<br>(18.1) |                                  |        | 567<br>(27.9) | 1015<br>(49.9) | 451<br>(22.2) |                                  |       |

\*OR for risk allele homozygous genotype versus other homozygous genotype (CC vs TT; AA vs CC; GG vs AA) within each clinical category

<sup>†</sup>OR for risk allele homozygous genotype versus heterozygous + other homozygous genotypes (CC vs TT+CT; AA vs CC+AC; GG vs AA+AG) within each clinical category

Table S5: Allele frequency distributions in clinical subgroups and controls at three 6p22 SNPs.

|                      | rs4712653      |                |                     |                        | rs9295536      |                |                     |                        | rs6939340      |                |                     |                         |
|----------------------|----------------|----------------|---------------------|------------------------|----------------|----------------|---------------------|------------------------|----------------|----------------|---------------------|-------------------------|
|                      | T (%)          | C (%)          | OR* (95% CI)        | P*                     | C (%)          | A (%)          | OR* (95% CI)        | P*                     | A (%)          | G (%)          | OR* (95% CI)        | P*                      |
| <b>Stage 4</b>       | 338<br>(42.3)  | 460<br>(56.7)  | 1.63<br>(1.40-1.90) | 3.92x10 <sup>-10</sup> | 375<br>(45.7)  | 445<br>(54.3)  | 1.59<br>(1.37-1.85) | 1.28x10 <sup>-9</sup>  | 334<br>(41.5)  | 470<br>(58.5)  | 1.58<br>(1.35-1.84) | 4.05x10 <sup>-9</sup>   |
| <b>Not Stage 4</b>   | 554<br>(48.8)  | 582<br>(51.2)  | 1.26<br>(1.10-1.43) | 0.0007                 | 611<br>(51.7)  | 571<br>(48.3)  | 1.25<br>(1.10-1.43) | 0.0006                 | 542<br>(46.6)  | 620<br>(53.3)  | 1.28<br>(1.12-1.46) | 0.0002                  |
|                      |                |                | 1.29<br>(1.08-1.55) | 0.005                  |                |                | 1.27<br>(1.06-1.52) | 0.009                  |                |                | 1.23<br>(1.03-1.47) | 0.02                    |
| <b>MYCN Amp</b>      | 122<br>(37.4)  | 204<br>(62.6)  | 2.00<br>(1.58-2.52) | 2.89 x10 <sup>-9</sup> | 138<br>(41.3)  | 196<br>(58.7)  | 1.90<br>(1.52-2.39) | 2 x10 <sup>-8</sup>    | 124<br>(37.1)  | 210<br>(62.9)  | 1.89<br>(1.51-2.39) | 3 x10 <sup>-8</sup>     |
| <b>MYCN Not Amp</b>  | 754<br>(48.0)  | 818<br>(52.0)  | 1.30<br>(1.15-1.46) | 0.000012               | 829<br>(50.8)  | 803<br>(49.2)  | 1.30<br>(1.15-1.46) | 0.000008               | 738<br>(46.3)  | 858<br>(53.7)  | 1.30<br>(1.16-1.46) | 0.000007                |
|                      |                |                | 1.54<br>(1.20-1.97) | 0.0005                 |                |                | 1.46<br>(1.15-1.86) | 0.002                  |                |                | 1.45<br>(1.14-1.86) | 0.002                   |
| <b>High-risk</b>     | 321<br>(41.7)  | 449<br>(58.3)  | 1.67<br>(1.43-1.95) | 7.74x10 <sup>-11</sup> | 352<br>(44.5)  | 440<br>(55.5)  | 1.68<br>(1.44-1.95) | 3.91x10 <sup>-11</sup> | 318<br>(40.8)  | 462<br>(59.2)  | 1.63<br>(1.39-1.90) | 6.26 x10 <sup>-10</sup> |
| <b>Not High-risk</b> | 541<br>(49.0)  | 563<br>(51.0)  | 1.24<br>(1.08-1.42) | 0.0013                 | 604<br>(52.5)  | 546<br>(47.5)  | 1.21<br>(1.06-1.38) | 0.004                  | 529<br>(47.0)  | 597<br>(53.0)  | 1.26<br>(1.11-1.44) | 0.0005                  |
|                      |                |                | 1.34<br>(1.12-1.62) | 0.002                  |                |                | 1.38<br>(1.15-1.66) | 0.0005                 |                |                | 1.29<br>(1.07-1.55) | 0.007                   |
| <b>Controls</b>      | 2214<br>(54.5) | 1852<br>(45.5) |                     |                        | 2337<br>(57.3) | 1743<br>(42.7) |                     |                        | 2149<br>(52.9) | 1917<br>(47.1) |                     |                         |

\*There are three odd-ratios (OR) and *P*-values listed for each SNP and clinical category. The first two are for allelic test of each subgroup versus controls and the third row is for the allelic test between the two subgroups.

Figure S1A. Quantile-quantile plot of genome-wide association results prior to Eigenstrat correction.

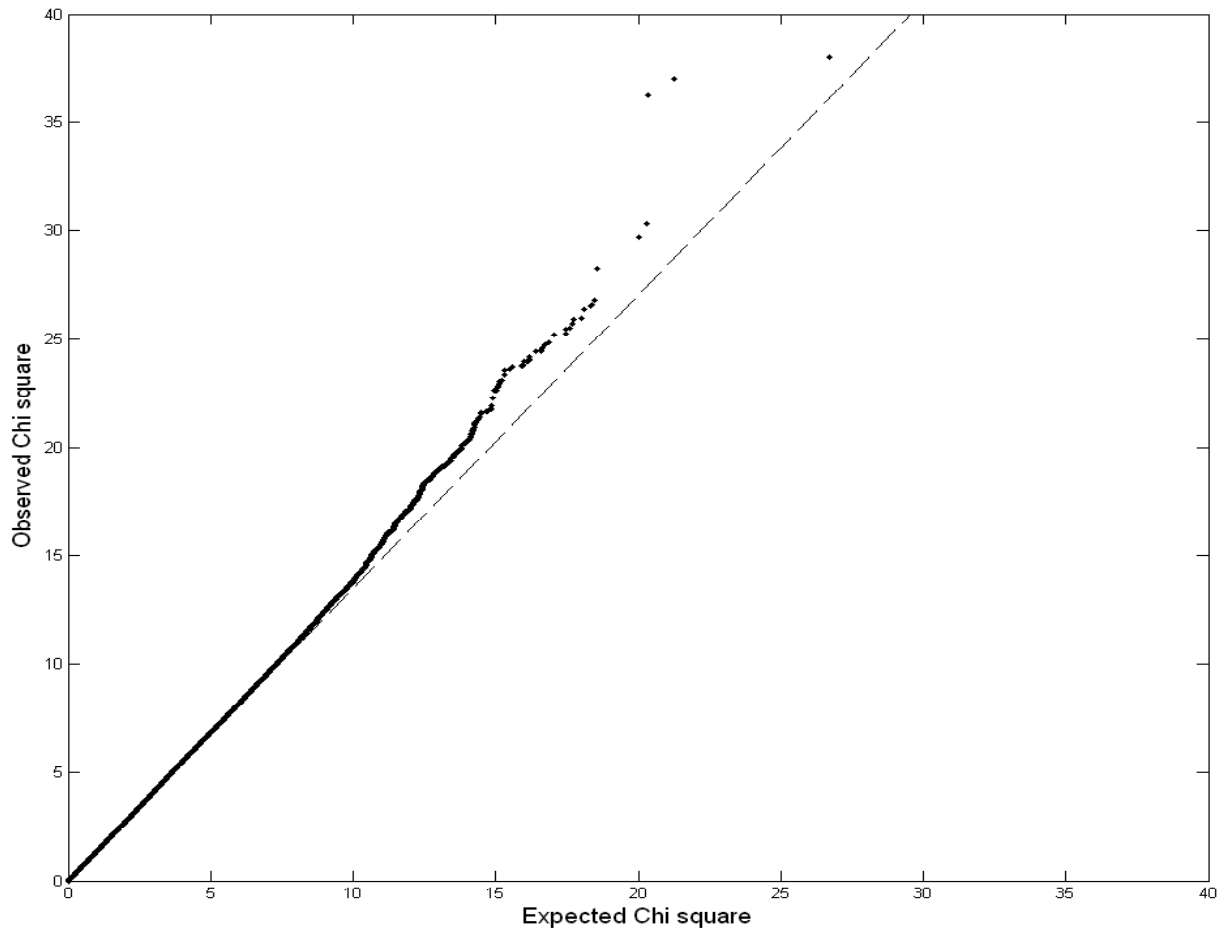

**Figure S1B. Quantile-quantile plot of genome-wide association results after Eigenstrat correction showing that many of the potentially genome-wide significant SNPs in S1A are no longer significant, and the only three remaining genome-wide significant SNPs are ones mapping in tight linkage disequilibrium at 6p22.**

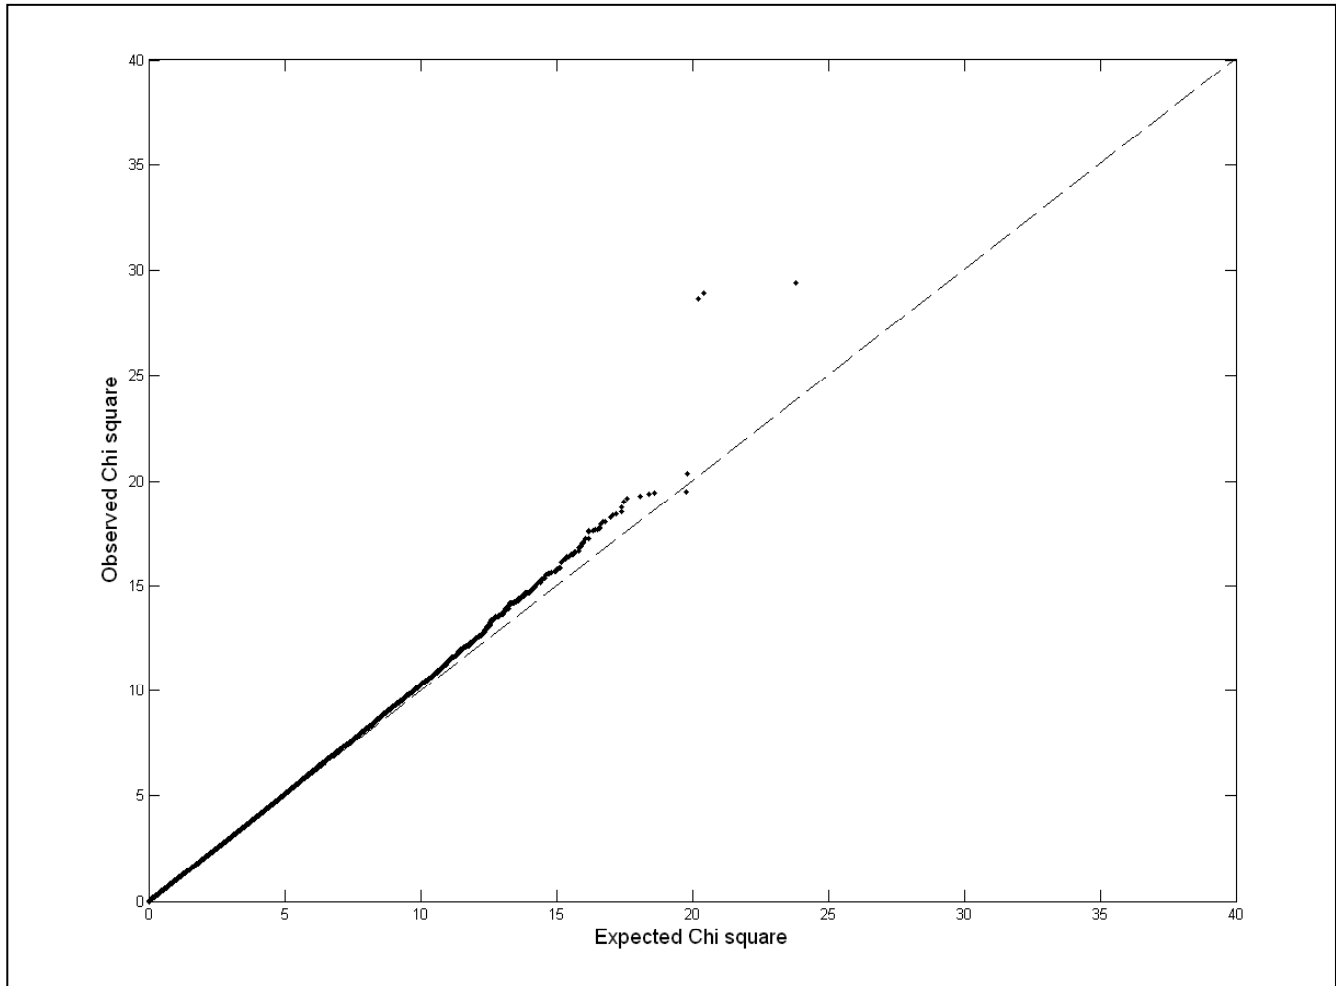

Figure S2. Event-free survival probabilities for neuroblastoma patients with the homozygous at-risk genotype compared to those homozygous for the non-risk allele at rs6939340.

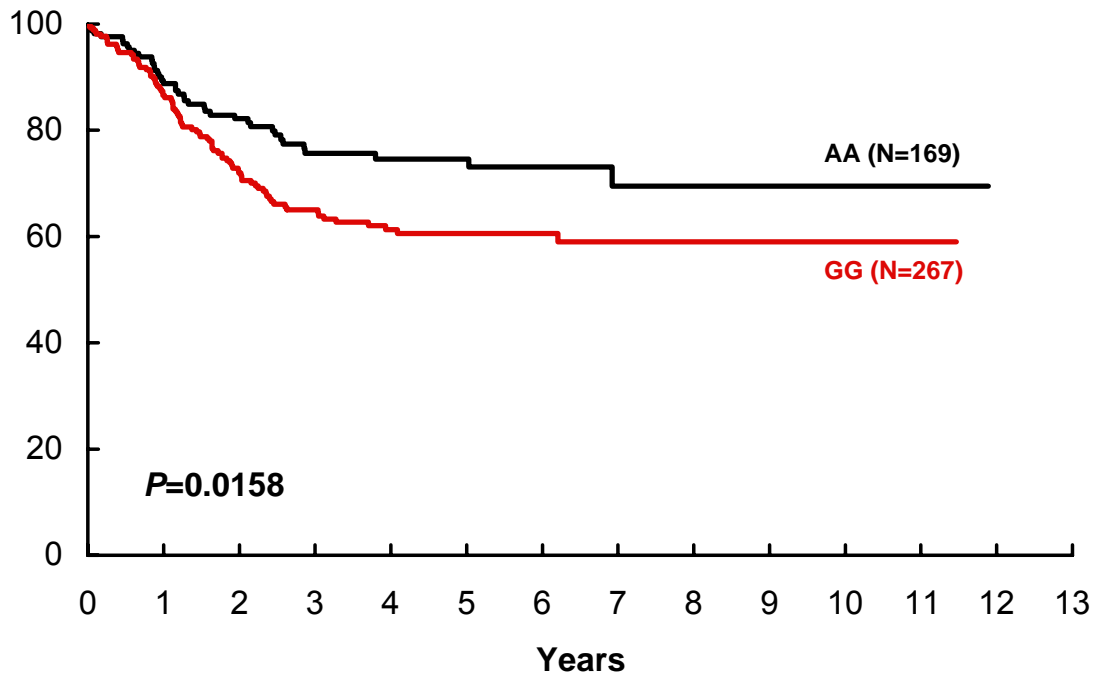

Supplement: nejm_maris_2585sa1.pdf [file nejm_maris_2585sa1.pdf]
